# Supplementary material
Source: PubMed Central journal article supplement (PMC4878814)
Supplement: bi5b01285_si_001.pdf [file bi5b01285_si_001.pdf]

## Supporting Information

Mechanism of the human nucleocytoplasmic hexosaminidase D

Matthew G. Alteen<sup>1,2</sup>, Verena Oehler<sup>2</sup>, Ivana Nemčovičová<sup>3,¶</sup>, Iain B. H. Wilson<sup>3</sup>, David J. Vocadlo<sup>1\*</sup>, Tracey M. Gloster<sup>2\*</sup>

(1) Department of Chemistry, Simon Fraser University, 8888 University Drive, Burnaby, BC, V5A 1S6, Canada

(2) Biomedical Sciences Research Complex, University of St Andrews, North Haugh, St Andrews, Fife, KY16 9ST, UK

(3) Department für Chemie, Universität für Bodenkultur, Muthgasse 18, A-1190 Wien, Austria

¶ Current address: Virologický ústav, Slovenská akadémia vied, Dúbravská cesta 9, 845 38 Bratislava, Slovakia

\* To whom correspondence should be addressed:

Tracey M. Gloster [tmg@st-andrews.ac.uk](mailto:tmg@st-andrews.ac.uk)

David Vocadlo [dvocadlo@sfu.ca](mailto:dvocadlo@sfu.ca)

**Table S1. Primers used for mutagenesis of HexD.**

| <b>Mutant</b> | <b>Primer</b>                      |
|---------------|------------------------------------|
| D148A Forward | CTGCACATCGGGTGTGCTGAGGTCTATTACCTC  |
| D148A Reverse | GAGGTAATAGACCTCAGCACACCCGATGTGCAG  |
| D148N Forward | CTGCACATCGGGTGTAAATGAGGTCTATTACC   |
| D148N Reverse | GGTAATAGACCTCATTACACCCGATGTGCAG    |
| E149A Forward | CACATCGGGTGTGATGCGGTCTATTACCTCGGAG |
| E149A Reverse | CTCCGAGGTAATAGACCGCATCACACCCGATGTG |
| E149Q Forward | CACATCGGGTGTGATCAGGTCTATTACCTCG    |
| E149Q Reverse | CGAGGTAATAGACCTGATCACACCCGATGTG    |
| H92A Forward  | GTGCAGACATTTGGAGCCATGGAGTTTGTGCT   |
| H92A Reverse  | AGCACAAACTCCATGGCTCCAAATGTCTGCAC   |

**Table S2. Spectrophotometric parameters used for monitoring of Brønsted analyses.**

| Substrate                                  | $pK_a^a$ | $\lambda$ (nm) | $\epsilon$ ( $M^{-1} \text{ cm}^{-1}$ ) <sup>b</sup> | [E] <sub>0</sub><br>WT<br>( $\mu\text{M}$ ) | [E] <sub>0</sub><br>D148A<br>( $\mu\text{M}$ ) | [E] <sub>0</sub><br>E149A<br>( $\mu\text{M}$ ) |
|--------------------------------------------|----------|----------------|------------------------------------------------------|---------------------------------------------|------------------------------------------------|------------------------------------------------|
| 3,4-NO <sub>2</sub> P-GalNAc ( <b>1e</b> ) | 5.42     | 400            | 12900                                                | 0.1                                         | 1                                              | 0.1                                            |
| 3F4NP-GalNAc ( <b>1f</b> )                 | 6.42     | 388            | 17600                                                | 0.1                                         | 1                                              | 0.1                                            |
| pNP-GalNAc ( <b>1a</b> )                   | 7.18     | 400            | 13210                                                | 0.1                                         | 2                                              | 0.1                                            |
| 4MU-GalNAc ( <b>3</b> )                    | 7.5      | 360            | 8600                                                 | 0.2                                         | 5                                              | 0.2                                            |
| mNP-GalNAc ( <b>1g</b> )                   | 8.29     | 330            | 650                                                  | 1                                           | --                                             | 1                                              |
| pCIP-GalNAc ( <b>1h</b> )                  | 9.47     | 280            | 720                                                  | 2                                           | --                                             | 5                                              |
| P-GalNAc ( <b>1i</b> )                     | 9.99     | 269            | 969                                                  | 2                                           | --                                             | --                                             |
| pOMeP-GalNAc ( <b>1j</b> )                 | 10.2     | 296            | 1670                                                 | 2                                           | --                                             | --                                             |

<sup>a</sup>  $pK_a$  values were obtained from previously reported analyses [1-3].

<sup>b</sup> Extinction coefficients were obtained from Macauley *et al.* [4] with the exception of 4-methoxyphenyl-*O*-GalNAc which was calculated experimentally.

## Synthetic Schemes S1 and S2: Synthesis of galactosaminide substrates.

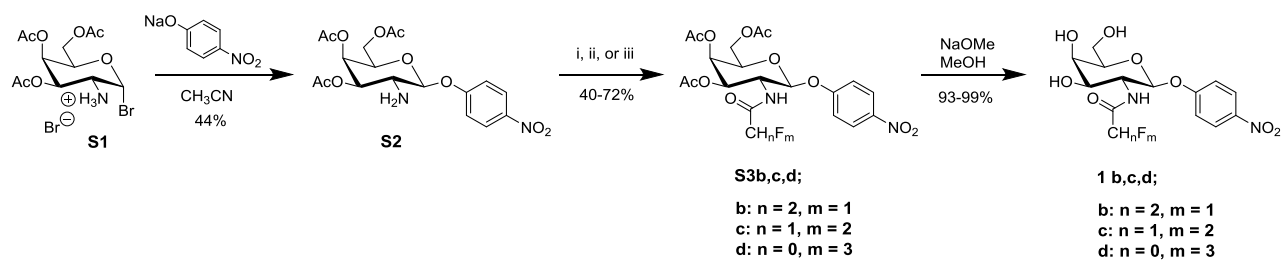

**Scheme S1:** Synthesis of fluorinated *N*-acyl substrates. (i)  $\text{NaOOCCH}_2\text{F}$ , Amberlite-120 H<sup>+</sup>, HBTU,  $\text{Et}_3\text{N}$ , DMF, 0°C, 70%; (ii)  $\text{HOOCH}_2\text{F}$ , HBTU,  $\text{Et}_3\text{N}$ , DMF, 0°C, 62%; (iii)  $(\text{CF}_3\text{CO})_2\text{O}$ ,  $\text{Et}_3\text{N}$ ,  $\text{CH}_2\text{Cl}_2$ , 0°C, 40%.

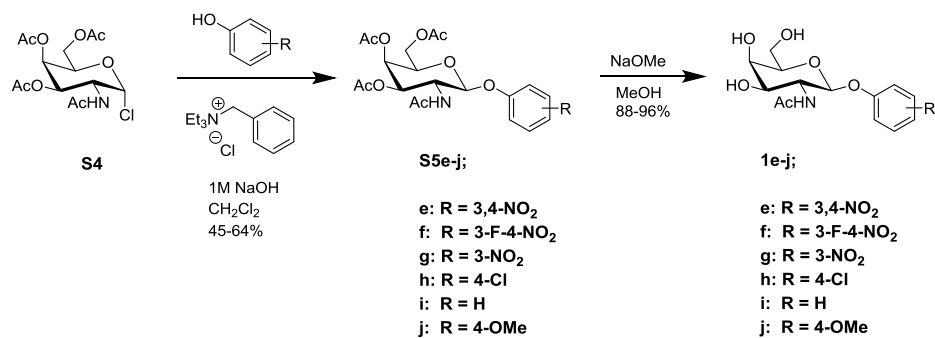

**Scheme S2:** Synthesis of aryl *N*-acetylgalactosamine substrate analogues.

Figure S1. Sequence alignment of HexD with the lysosomal  $\beta$ -hexosaminidases HexA and HexB. Black shading shows identical residues; grey shading shows similar residues. Starred residues were mutated as part of this study. The alignment was performed in Clustal Omega and figure produced in BoxShade.

```

HexD 1 -----
HexA 1 -----M*SSRLWFSL-----LLAAAFAGRATALWPF
HexB 1 MELCGLGLPRPMLLALLLALLLAAMLALLTQVALV*VQVAEAAARAPSVSAKPGPALWPLP

HexD 1 -----
HexA 28 QNFQTS*DQRYVLY*PN*N*FQFYDVS*SAA*OPGCSVLD*EAFORY*RDLLFGSGS*W*PRPYLTGKR
HexB 61 LSVKMT*PNLLH*LAP*EN*FYISHSPN*STAGPSC*TLL*EAFRRY*HGYI*IFGFYK*W*HHEPAEFQA

HexD 1 -----
HexA 88 H*TLEKNV*L*VSVVTPG*CNQLP*TL*ESV*ENY*TL*TINDDQCL*LSET*VW*GALRGL*ETFSQ*LVW
HexB 121 K*TQVQQL*LV*SITLQ*SE*CDAF*PN*ISS*DES*YTL*LVKEPVAV*LKANR*VW*GALRGL*ETFSQ*LVY

HexD 1 -----MSGSTPFQMR*L*VH*LDLKGAPPKVSYL*SE*TFPLFRA-----M*GANGLL
HexA 148 KSAE*G*TFF*INKTE*TE*DF*PRF*PHRGL*LIDTSRHYLE---LSS*LID*TL*DVMAY*KNL*VFHW
HexB 181 QDSY*G*TFF*TIN*EST*L*DS*PRFS*HRGL*LIDTSRHYLE---VK*TL*K*TL*DAMA*F*N*K*F*N*V*L*H*W

HexD 43 IEYEDM*FPYEGPLR-----LLRAKYAV*S*SEI*KEILHL*AGL*NELEVI*PLVQ*TFGHME
HexA 205 LVDD*SP*FPY*ES*FT*PEL*MRKGS*YN*PV*THI*Y*TA*QDV*KEVIEY*ARLRGIRV*LAE*FDTPGH*L
HexB 238 IVDD*Q*SP*FPY*QSI*TF*PEL*SNKGS*YS*-LSHV*Y*T*ND*V*RMVIEY*ARLRGIRV*LPE*FDTPGH*L

HexD 95 FVL-----KHTAFAHLREV*GS*FPCTLN*PHEAESLALVGAMIDQ*VLELH*PGA*QRLHIG*CD*
HexA 265 SWGP*C*IPGL*LLTPCY*SGSEPSG*TF*C-*PVN*PSL*N*TYE*FMS*TF*LEVSSVFP*-DFY*LHLGGD
HexB 297 SWGK*G*QKD*LLTPCY*SRQNKLD*S*F*C-*PI*N*PT*L*N*T*YS*FL*T*FF*KE*ISEV*FP*-D*Q*FIHLGGD

HexD 149 *EVY*YLGE*GEA*--SRR*NLQ*Q*ONS*T*-----GKLC*L*SHMRAVA*SGV*KARR*PSV*TP*LV*WDDML
HexA 323 EVDF*T*CK*SNPE*I*QDF*MR*KKGF*ED*FK*QLESFY*I*Q*TLLD*IVS*-----SYG*K*CV*VVW*QEVF
HexB 355 EVE*F*K*WE*SNPK*I*QDF*MR*QKGF*GTDF*KKLESFY*I*Q*KVLD*ITA*-----T*IN*K*SI*VW*QEVF

HexD 202 RDLPE*D*LAASG*VPQ*LV*EPV*LW*DY*TAD*LDV*HGK*VLLM*QY*RR*CG*FP*OLWA*ASAF-----
HexA 378 DNK*V*K*I*OP*--D*TI*-----IQ*V*RED*IPV*N*YMK*---ELE*L*V*TR*AG*FRALL*SAPW*YLN*RISY
HexB 410 DDK*A*K*LAP*--G*TI*-----VE*V*W*K*DS*---AY*PE*---ELS*R*V*T*AS*G*FP*V*IL*SAPW*YLD*LISY

HexD 256 -----KGATGPS*QAV*PPVEH*HL-----RNHV*Q*W*LQ*VAGS*G*PT---D
HexA 428 GPD*W*K*DF*Y*I*VE*PLA*FE*GT*PE*Q*K*ALV*IGGEAC*W*GEY*VD*N*T*N*L*V*PR*LW*PRAG*AV*AERL*WSN
HexB 457 GQD*W*R*K*Y*Y*K*VE*PL*DF*GG*T*Q*K*Q*L*F*IGGEAC*LW*GEY*VD*AT*N*L*TP*RLW*PRAS*AV*GERL*WSN

HexD 289 S*LQ*GI*L*TG*W*Q*RY*DHYS*VL*CEL*LPAG*V*PSLAAC*LQ*LLR*G*GF*DE*DV*KAK*VEN*LLGI*SSE
HexA 488 KL*TS*DL*TF*AYER*LS*--H*FR*CEL*L*RR*GV*QA*OPL*-----NV*G*F*CE*Q*EFE*Q*T-----
HexB 517 KD*V*R*D*MDD*AY*DRL*T*--R*H*RC*RM*VE*RG*IA*OPL*-----Y*AG*Y*C*N*H*EN*M-----

HexD 349 K*TD*PV*REGAGS*FP*GS*NILALV*TQ*VSL*HLR*SSVD*ALLEGN*RY*VTG*W*FS*PY*HR*Q*KLI*HPVM
HexA -----
HexB -----

HexD 409 V*QH*I*Q*PAALS*LLA*Q*W*STL*VQ*ELEAAL*QLAF*YPDAVEE*WLEEN*VH*PSL*Q*RLQ*ALLQ*DLSEV
HexA -----
HexB -----

HexD 469 S*AP*PL*P*PT*SPGRD*VAQDP
HexA -----
HexB -----

```

## References

- (1) Barlin, G. B., and Perrin, D. D. (1966) Prediction of the strengths of organic acids. *Q. Rev. Chem. Soc.* 20, 75-102.
- (2) Kortum, G., Vogel, W., and Andrussov, K. (1961) Dissociation constants of organic acids in aqueous solution. *Pure Appl. Chem.* 1, 187-536.
- (3) Robinson, R. A., Davis, M. M., Paabo, M., and Bower, V. E. (1960) Ionization constants of four dinitrophenols in water at 25 °C. *Res. Nat. Bur. Stand. Sect. A.* 64, 347-352.
- (4) Macauley, M. S., Whitworth, G. E., Debowski, A. W., Chin, D. and Vocadlo, D. J. (2005) O-GlcNAcase uses substrate-assisted catalysis: kinetic analysis and development of highly selective mechanism-inspired inhibitors. *J. Biol. Chem.* 280, 25313-25322.
